# Supplementary material for: Photoinduced synthesis and ordering of lamellar n-alkylsiloxane films
Source: Royal Society of Chemistry journal article supplement (doi:10.1039/c1jm13053f), 2011-11-03
Supplement: c1jm13053f.pdf [file c1jm13053f.pdf]

## Electronic Supplementary Information

### Photoinduced Synthesis and Ordering of Lamellar *n*-Alkylsiloxane Films

Lingli Ni<sup>a</sup>, Abraham Chemtob<sup>\*a</sup>, Céline Croutxé-Barghorn<sup>a</sup>, Jocelyne Brendlé<sup>b</sup>, Loïc Vidal<sup>b</sup>, Séverinne Rigolet<sup>b</sup>.

<sup>a</sup>Laboratory of Photochemistry and Macromolecular Engineering, ENSCMu, University of Haute-Alsace, 3 rue Alfred Werner 68093 Mulhouse Cedex, France

<sup>b</sup>Institut de Science des Matériaux de Mulhouse, Mulhouse, LRC-CNRS, 7228, ENSCMu, University of Haute-Alsace, 3 rue Alfred Werner 68093 Mulhouse Cedex, France

| Sample             | T <sup>1</sup> (mol%) | T <sup>2</sup> (mol%) | T <sup>3</sup> (mol%) | Molar ratio (OH / Si) |
|--------------------|-----------------------|-----------------------|-----------------------|-----------------------|
| C <sub>8</sub> PS  | 0                     | 44                    | 56                    | 0.44                  |
| C <sub>10</sub> PS | 1                     | 46                    | 53                    | 0.48                  |
| C <sub>12</sub> PS | 2                     | 47                    | 51                    | 0.51                  |
| C <sub>16</sub> PS | 8                     | 64                    | 28                    | 0.8                   |
| C <sub>18</sub> PS | 11                    | 62                    | 27                    | 0.84                  |

**Table S1** Proportion of siloxane subspecies and silanol functions in *n*-alkylsiloxane films synthesized *via* sol-gel photopolymerization

---

\* Corresponding author. Fax: +33 3 8933 5017; Tel: +33 3 8933 5030; E-mail: abraham.chemtob@uha.fr

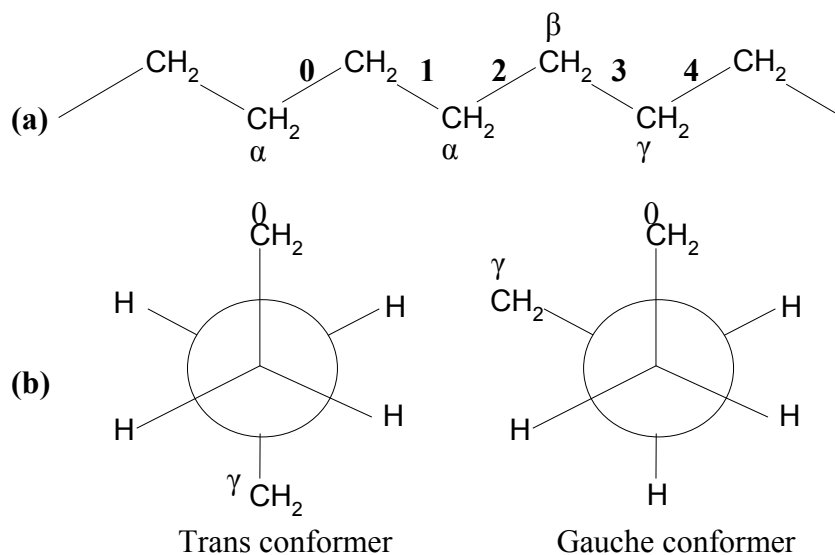

**Fig. S1** (a) Portion of the interior methylene groups of an alkyl chains in all-trans, planar zigzag conformation. (b) Newman projections along the C-C bond **2** illustrating trans and gauche conformers

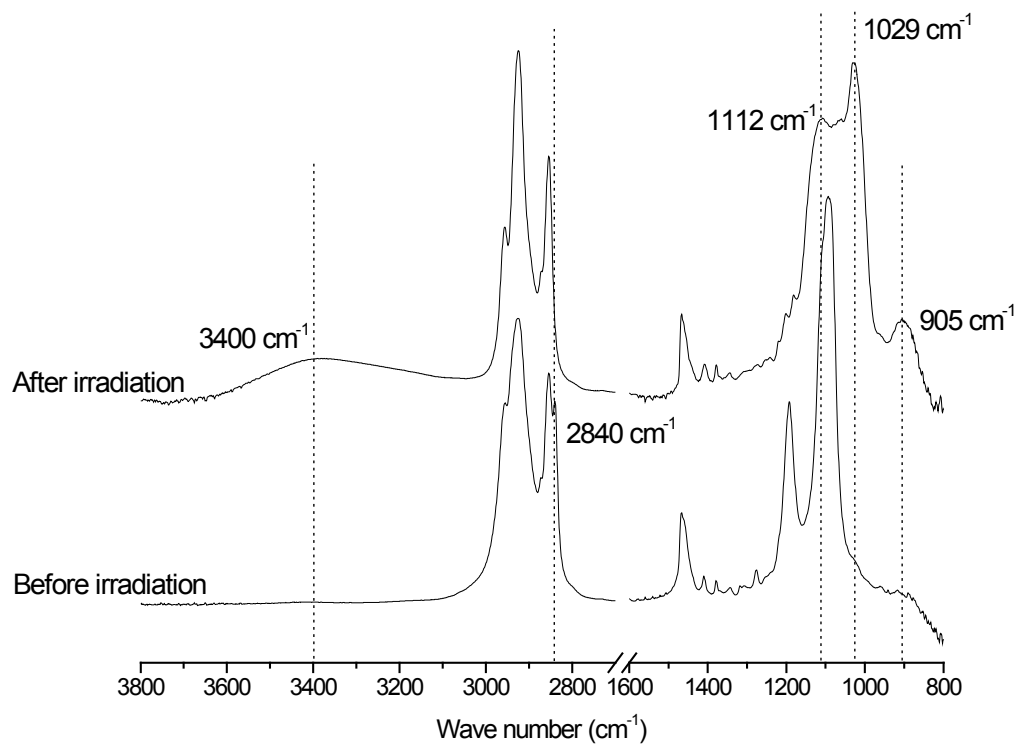

**Fig. S2** FTIR spectra of C<sub>10</sub>TMS film before and after irradiation

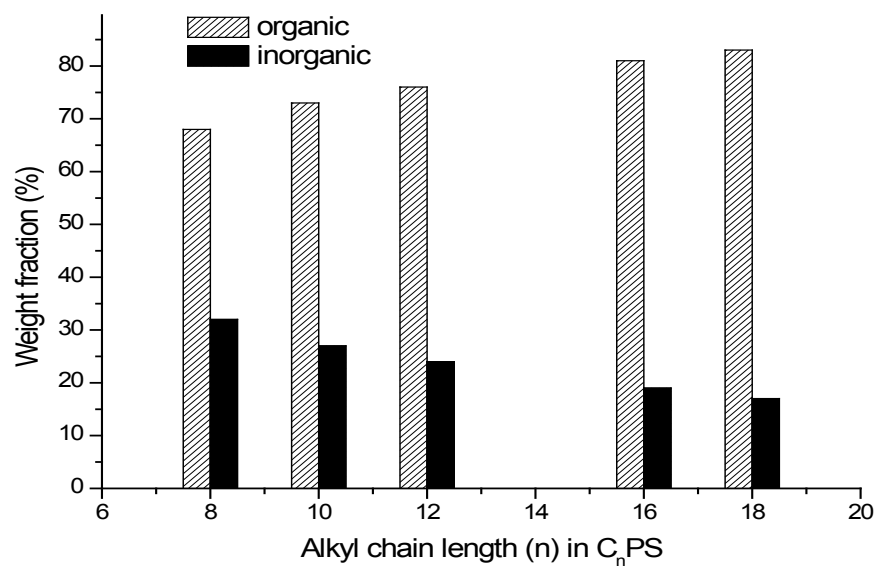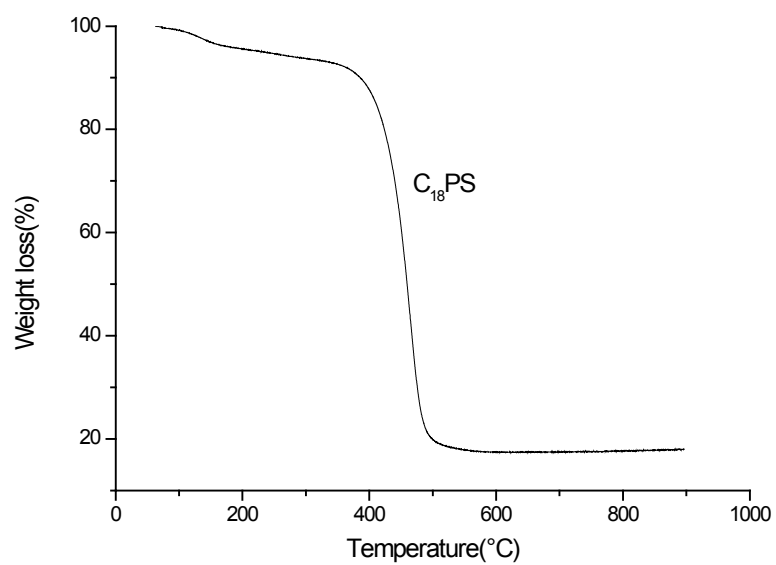

**Fig. S3** Proportion of organic and inorganic moieties in C<sub>n</sub>PS films (up). Thermal gravimetric plot of C<sub>18</sub>PS (down).
